# Supplementary material
Source: PubMed Central journal article supplement (PMC11774076)
Supplement: NA-007-D4NA00564C-s001.pdf [file NA-007-D4NA00564C-s001.pdf]

Supporting information for:

Passivation, phase, and morphology control of CdS  
nanocrystals probed using fluorinated aromatic amines and  
solid-state NMR spectroscopy

Mark A. Buckingham,<sup>a,§</sup> Robert Crawford,<sup>b,§</sup> Yi Li,<sup>a,§</sup> Ran Eitan Abutbul,<sup>b</sup> Bing Han,<sup>a</sup> Kerry Hazledine,<sup>c</sup> Sarah Cartmell,<sup>a</sup> Alex Walton,<sup>c</sup> Alex S. Eggeman,<sup>a</sup> David J. Lewis<sup>\*a</sup> and Daniel Lee<sup>\*b</sup>

<sup>a</sup> Department of Materials, The University of Manchester, Manchester M13 9PL, U.K.

<sup>b</sup> Department of Chemical Engineering, University of Manchester, Manchester M13 9PL,  
UK.

<sup>c</sup> Department of Chemistry and the Photon Science Institute, The University of Manchester,  
Oxford Road, Manchester, M13 9PL, UK.

§ These authors contributed equally

\* Corresponding authors: [David.lewis-4@manchester.ac.uk](mailto:David.lewis-4@manchester.ac.uk), [Daniel.lee@manchester.ac.uk](mailto:Daniel.lee@manchester.ac.uk)

## Transmission electron microscopy

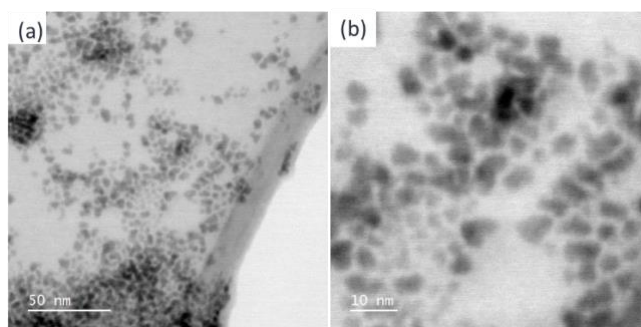

**Figure S1.** Scanning transmission electron microscope (STEM) bright field (BF) micrograph of CdS NCs synthesized in TOPO.

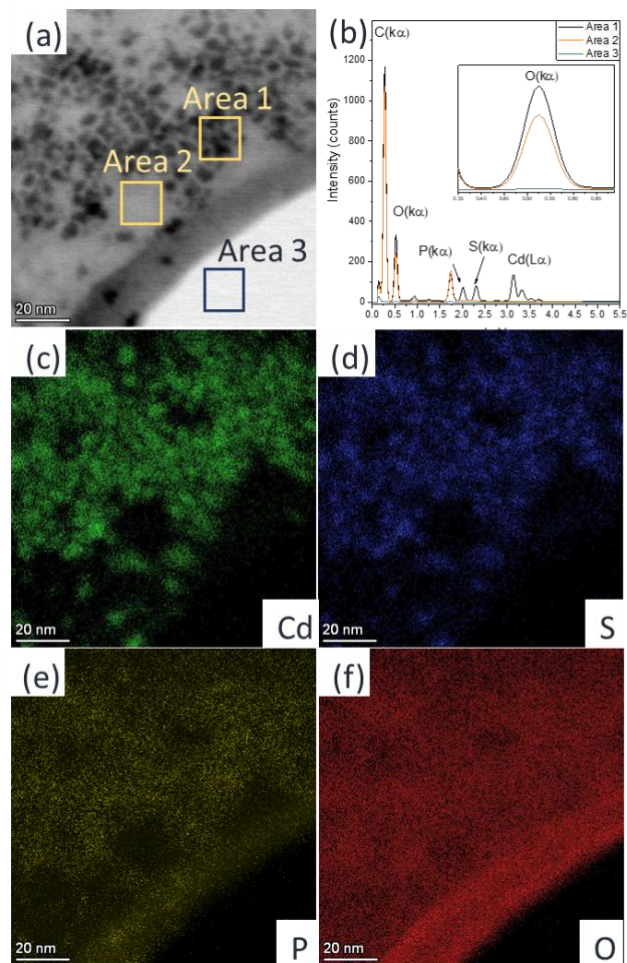

**Figure S2.** (a) Scanning transmission electron microscope (STEM) bright field (BF) micrograph of CdS NCs synthesized in TOPO (b) STEM-EDS spectra taken from area highlighted in a. Inset shows enlarged area of the O  $k\alpha$  lines. The difference in the EDS spectra between area 1 and area 2 suggest higher content of O in the vicinity of the CdS NC. Elemental mapping of the image shown in a. (c) Cadmium (d) Sulphur (e) Phosphorous (f) Oxygen

## Solid state NMR

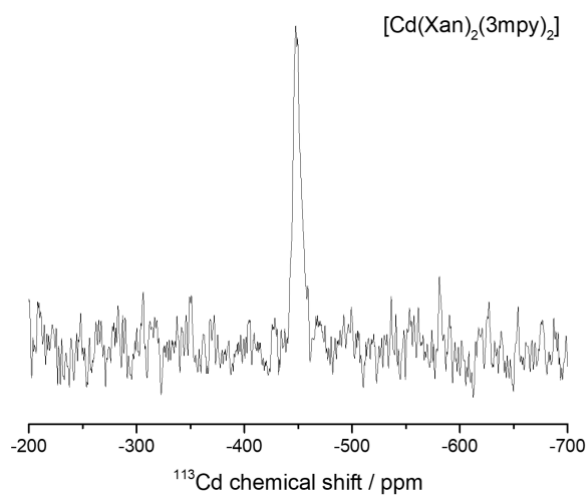

**Figure S3.**  $^{113}\text{Cd}$  MAS NMR spectrum of the molecular precursor  $[\text{Cd}(\text{Xan})_2(3\text{-mpy})_2]$ .

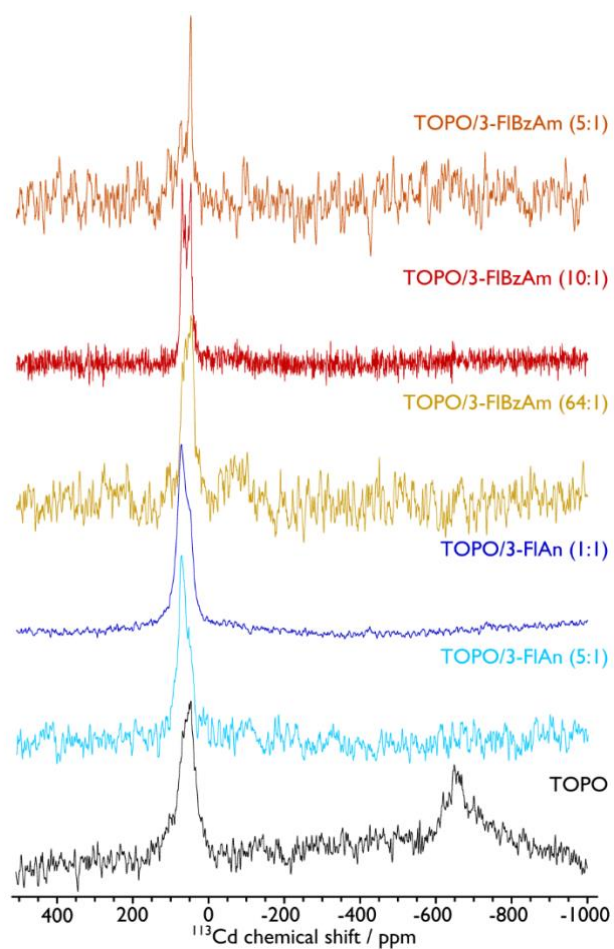

**Figure S4.**  $^{113}\text{Cd}$  MAS NMR spectra of CdS NCs with indicated ligands. An MAS frequency of 8 kHz was used for TOPO, 10 kHz was used for TOPO/3-FIAAn (1:1), and 12 kHz was used for TOPO/3-FIAAn (5:1), TOPO/3-FIBzAm (64:1), TOPO/3-FIBzAm (10:1), and TOPO/3-FIBzAm (5:1) CdS NCs.

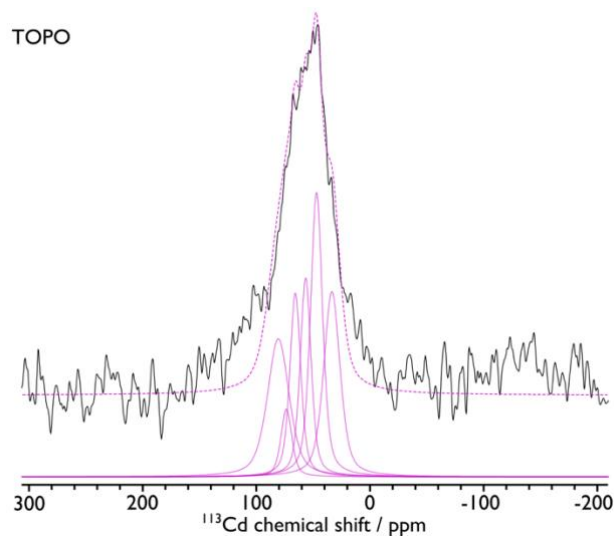

**Figure S5.**  $^{113}\text{Cd}$  MAS NMR spectrum of TOPO CdS NCs and associated fitting with deconvolution (pink) and summation (dashed pink).

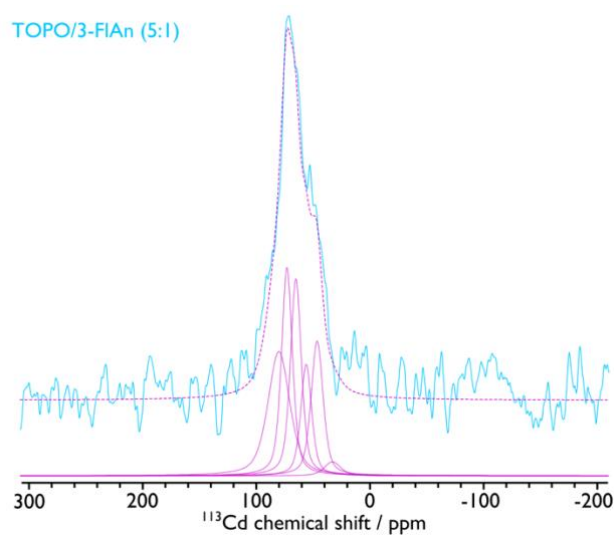

**Figure S6.**  $^{113}\text{Cd}$  MAS NMR spectrum of TOPO/3-FIAn (5:1) CdS NCs and associated fitting with deconvolution (pink) and summation (dashed pink).

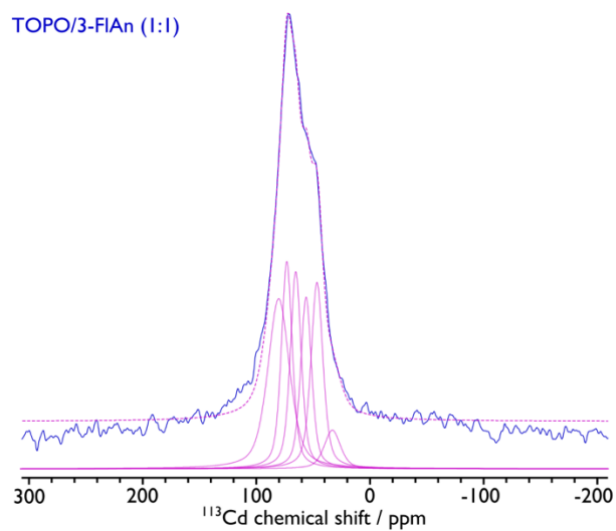

**Figure S7.**  $^{113}\text{Cd}$  MAS NMR spectrum of TOPO/3-FIAn (1:1) CdS NCs and associated fitting with deconvolution (pink) and summation (dashed pink).

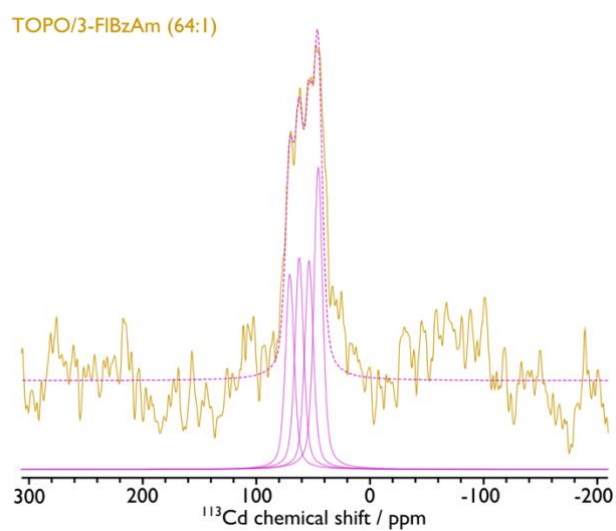

**Figure S8.**  $^{113}\text{Cd}$  MAS NMR spectrum of TOPO/3-FIBzAm (64:1) CdS NCs and associated fitting with deconvolution (pink) and summation (dashed pink).

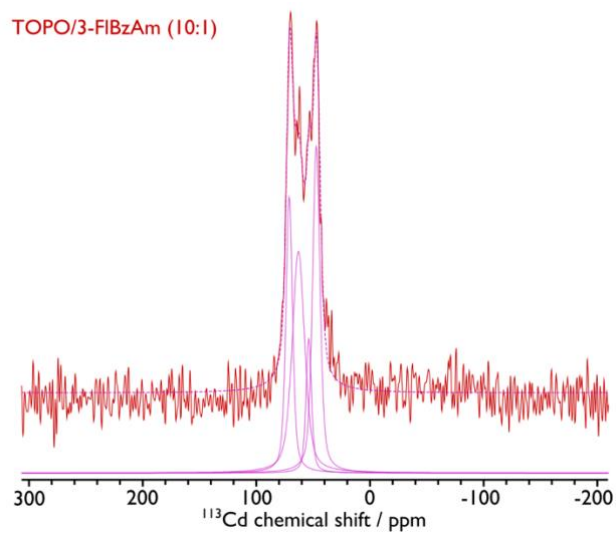

**Figure S9.**  $^{113}\text{Cd}$  MAS NMR spectrum of TOPO/3-FIBzAm (10:1) CdS NCs and associated fitting with deconvolution (pink) and summation (dashed pink).

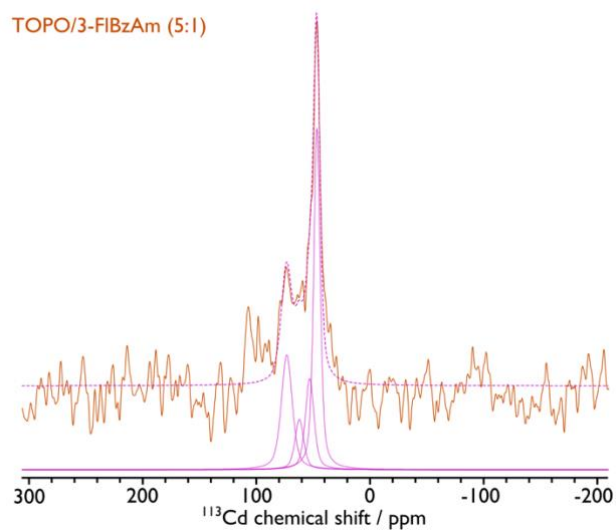

**Figure S10.**  $^{113}\text{Cd}$  MAS NMR spectrum of TOPO/3-FIBzAm (5:1) CdS NCs and associated fitting with deconvolution (pink) and summation (dashed pink).



**Table S1.**  $^{113}\text{Cd}$  NMR parameters extracted from data fitting (see Figs. S2-S7). The fits are not definitive owing to the large associated errors and ambiguity.

| <b>CdS nanocrystal system</b> | <b><math>^{19}\text{F}</math> chemical shift (<math>\delta_{\text{iso}}</math>) / ppm</b> | <b><math>^{19}\text{F}</math> linewidth (FWHM) / Hz</b> | <b>Relative integral / %</b> |
|-------------------------------|-------------------------------------------------------------------------------------------|---------------------------------------------------------|------------------------------|
| TOPO only                     | 34                                                                                        | 1500                                                    | 21                           |
|                               | 48                                                                                        | 1100                                                    | 24                           |
|                               | 57                                                                                        | 1000                                                    | 15                           |
|                               | 66                                                                                        | 1000                                                    | 14                           |
|                               | 74                                                                                        | 1000                                                    | 5                            |
|                               | 81                                                                                        | 2000                                                    | 21                           |
| TOPO:3-FlAn (5:1)             | 34                                                                                        | 1500                                                    | 2                            |
|                               | 48                                                                                        | 1100                                                    | 16                           |
|                               | 57                                                                                        | 1000                                                    | 12                           |
|                               | 66                                                                                        | 1000                                                    | 21                           |
|                               | 74                                                                                        | 1000                                                    | 22                           |
|                               | 81                                                                                        | 2000                                                    | 27                           |
| TOPO:3-FlAn (1:1)             | 34                                                                                        | 1500                                                    | 5                            |
|                               | 48                                                                                        | 1100                                                    | 17                           |
|                               | 57                                                                                        | 1000                                                    | 15                           |
|                               | 66                                                                                        | 1000                                                    | 17                           |
|                               | 74                                                                                        | 1000                                                    | 17                           |
|                               | 81                                                                                        | 2000                                                    | 29                           |
| TOPO:3-FIBzAm (64:1)          | 46                                                                                        | 800                                                     | 33                           |
|                               | 54                                                                                        | 800                                                     | 23                           |
|                               | 63                                                                                        | 800                                                     | 23                           |
|                               | 71                                                                                        | 800                                                     | 21                           |
| TOPO:3-FIBzAm (10:1)          | 48                                                                                        | 680                                                     | 31                           |
|                               | 54                                                                                        | 505                                                     | 9                            |
|                               | 63                                                                                        | 1150                                                    | 36                           |
|                               | 71                                                                                        | 605                                                     | 24                           |
| TOPO:3-FIBzAm (5:1)           | 48                                                                                        | 600                                                     | 47                           |
|                               | 54                                                                                        | 800                                                     | 26                           |
|                               | 63                                                                                        | 800                                                     | 17                           |
|                               | 74                                                                                        | 1000                                                    | 10                           |

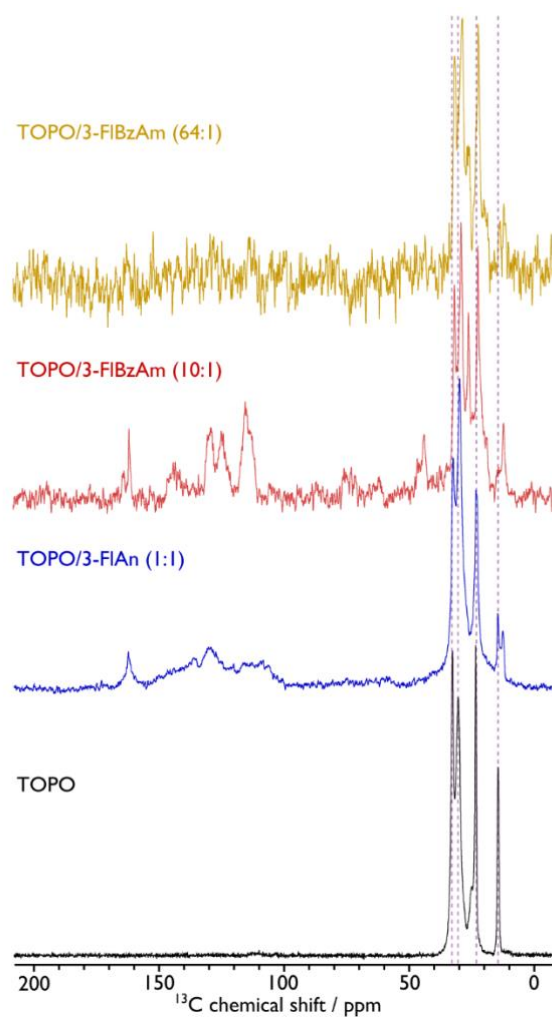

**Figure S11.**  $\{^1\text{H}\}\text{-}^{13}\text{C}$  CPMAS NMR spectra. An MAS frequency of 8 kHz was used for TOPO, 10 kHz was used for TOPO/3-FIAn (1:1) and TOPO/3-FIBzAm (10:1), and 12 kHz was used for TOPO/3-FIBzAm (64:1) CdS NCs. The dashed vertical lines are a guide for the eye.

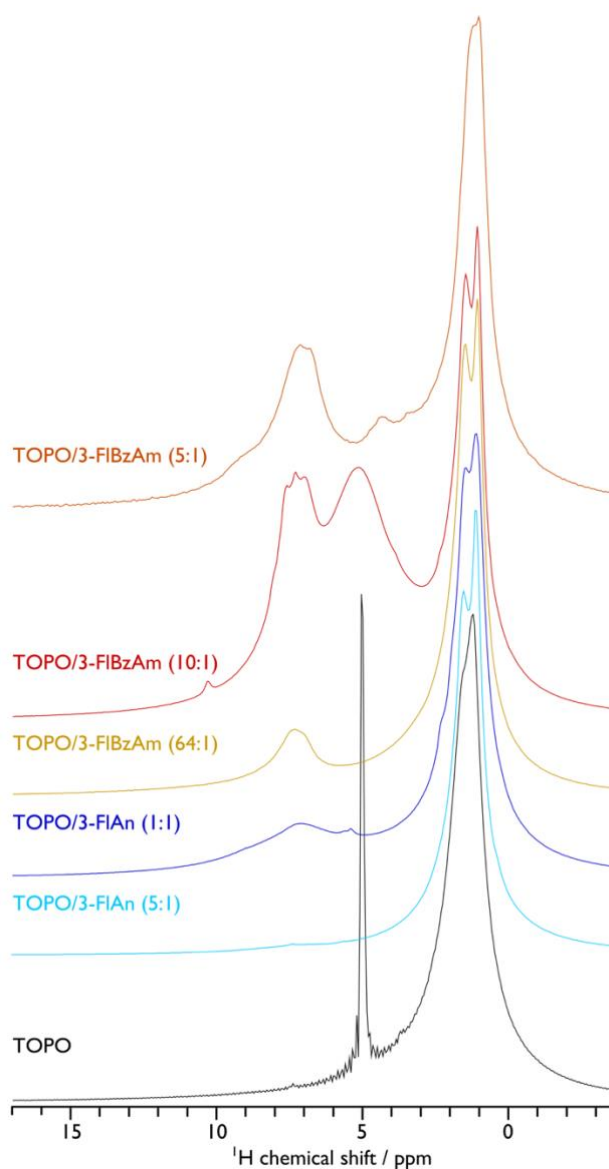

**Figure S12.**  $^1\text{H}$  MAS NMR spectra. An MAS frequency of 10 kHz was used for TOPO/3-FIAn (1:1), TOPO/3-FIBzAm (10:1), and TOPO/3-FIBzAm (5:1), and 12 kHz was used for TOPO, TOPO/3-FIAn (5:1), and TOPO/3-FIBzAm (64:1) CdS NCs.

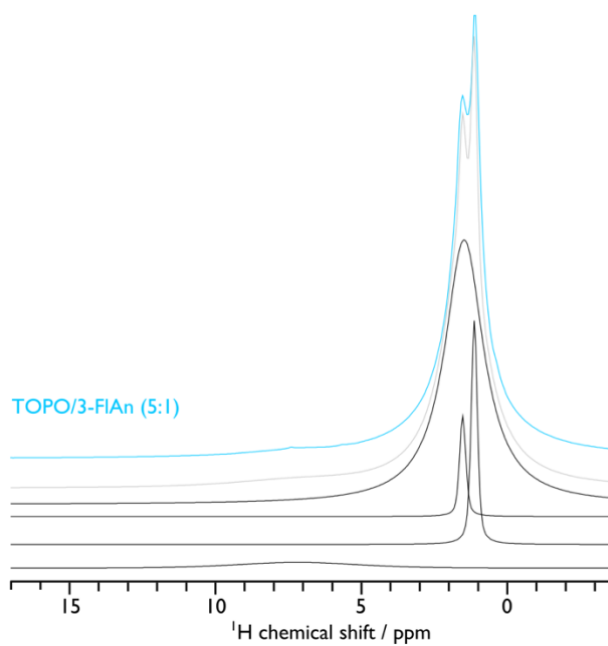

**Figure S13.**  $^1\text{H}$  MAS NMR spectrum of TOPO/3-FIAn (5:1) CdS NCs and associated fitting with deconvolution (black) and summation (grey).

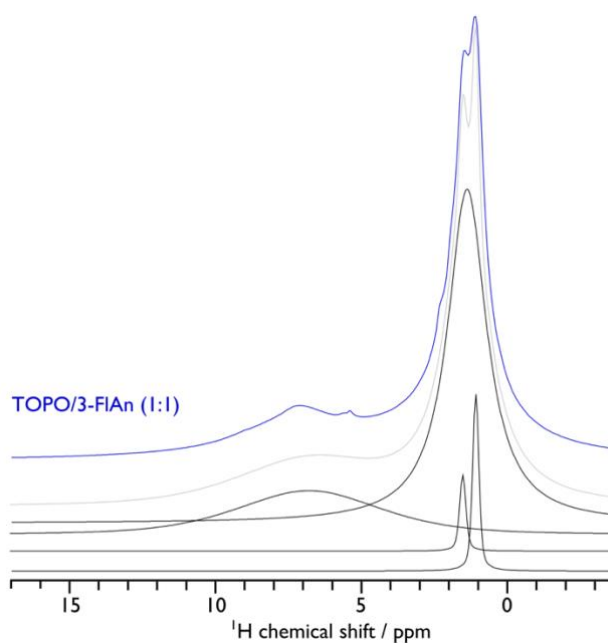

**Figure S14.**  $^1\text{H}$  MAS NMR spectrum of TOPO/3-FIAn (1:1) CdS NCs and associated fitting with deconvolution (black) and summation (grey).

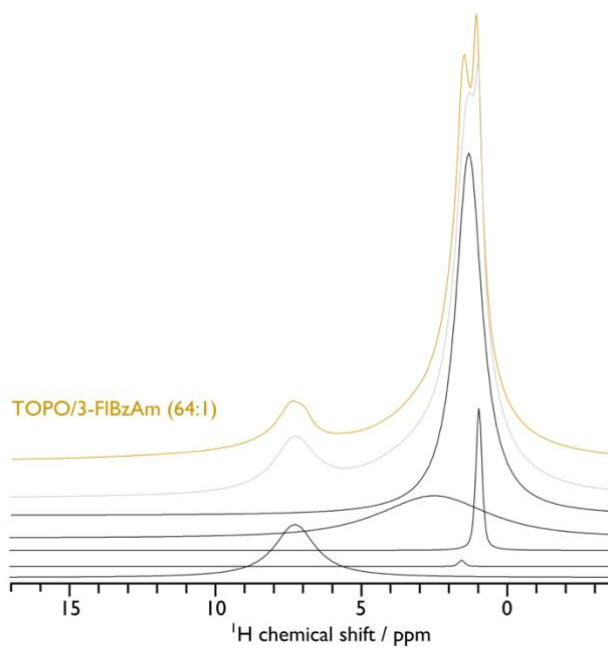

**Figure S15.**  $^1\text{H}$  MAS NMR spectrum of TOPO/3-FIBzAm (64:1) CdS NCs and associated fitting with deconvolution (black) and summation (grey).

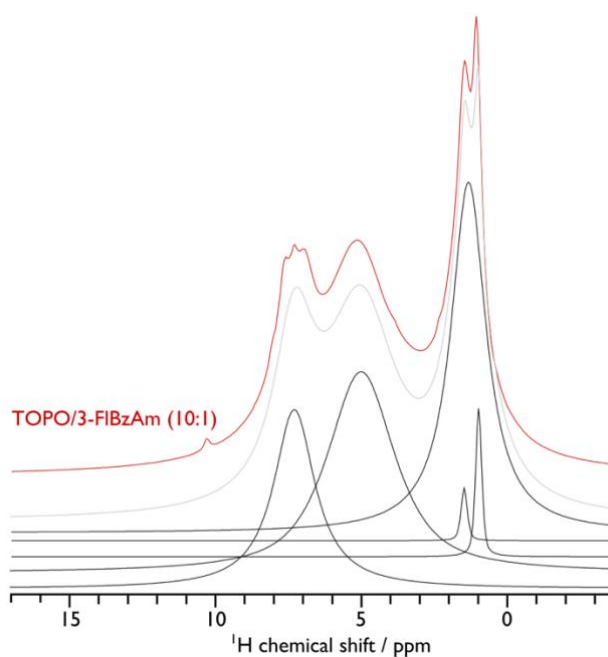

**Figure S16.**  $^1\text{H}$  MAS NMR spectrum of TOPO/3-FIBzAm (10:1) CdS NCs and associated fitting with deconvolution (black) and summation (grey).

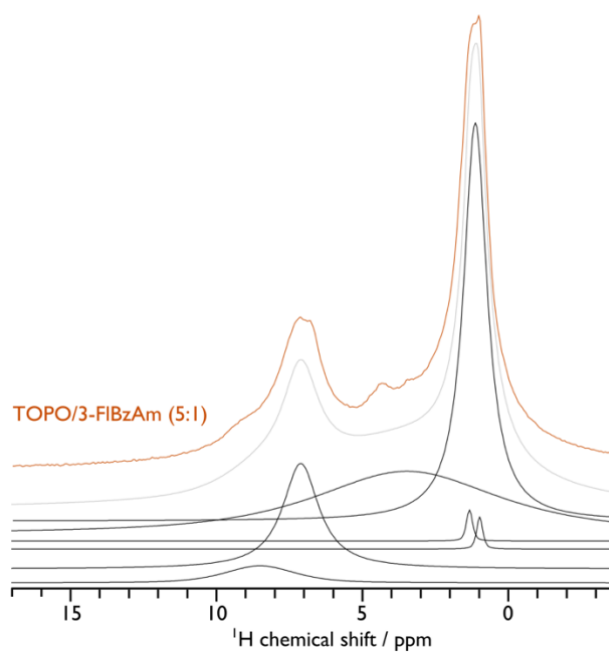

**Figure S17.**  $^1\text{H}$  MAS NMR spectrum of TOPO/3-FIBzAm (5:1) CdS NCs and associated fitting with deconvolution (black) and summation (grey).

**Table S2.**  $^1\text{H}$  NMR parameters extracted from data fitting (see Figs. S10-S14). The fits are not definitive owing to the large associated errors and ambiguity.

| <b>CdS nanocrystal system</b> | <b><math>^1\text{H}</math> chemical shift (<math>\delta_{\text{iso}}</math>) / ppm</b> | <b><math>^1\text{H}</math> linewidth (FWHM) / Hz</b> | <b>Relative integral / %</b> | <b>TOPO:ligand molar ratio (from <math>^1\text{H}</math> integral)</b> | <b>Expected TOPO:ligand molar ratio</b> |
|-------------------------------|----------------------------------------------------------------------------------------|------------------------------------------------------|------------------------------|------------------------------------------------------------------------|-----------------------------------------|
| TOPO only                     | N/A                                                                                    | N/A                                                  | N/A                          | N/A                                                                    | N/A                                     |
| TOPO:3-FlAn (5:1)             | 1                                                                                      | 100                                                  | 9                            | 1.6:1                                                                  | 1.5:1                                   |
|                               | 1.4                                                                                    | 650                                                  | 82                           |                                                                        |                                         |
|                               | 1.5                                                                                    | 100                                                  | 4                            |                                                                        |                                         |
|                               | 7.4                                                                                    | 2000                                                 | 5                            |                                                                        |                                         |
| TOPO:3-FlAn (1:1)             | 1                                                                                      | 100                                                  | 4                            | 1:4.7                                                                  | 1:3.5                                   |
|                               | 1.4                                                                                    | 650                                                  | 67                           |                                                                        |                                         |
|                               | 1.5                                                                                    | 100                                                  | 2                            |                                                                        |                                         |
|                               | 7.4                                                                                    | 2300                                                 | 27                           |                                                                        |                                         |
| TOPO:3-FlBzAm (64:1)          | 1                                                                                      | 100                                                  | 4                            | 1:2.7                                                                  | 16:1                                    |
|                               | 1.4                                                                                    | 440                                                  | 57                           |                                                                        |                                         |
|                               | 1.5                                                                                    | 100                                                  | 0                            |                                                                        |                                         |
|                               | 2.6                                                                                    | 1800                                                 | 26                           |                                                                        |                                         |
|                               | 7.4                                                                                    | 680                                                  | 13                           |                                                                        |                                         |
| TOPO:3-FlBzAm (10:1)          | 1                                                                                      | 100                                                  | 2                            | 1:7.0                                                                  | 3:1                                     |
|                               | 1.4                                                                                    | 580                                                  | 37                           |                                                                        |                                         |
|                               | 1.5                                                                                    | 100                                                  | 1                            |                                                                        |                                         |
|                               | 5.1                                                                                    | 1100                                                 | 38                           |                                                                        |                                         |
|                               | 7.4                                                                                    | 680                                                  | 22                           |                                                                        |                                         |
| TOPO:3-FlBzAm (5:1)           | 1                                                                                      | 100                                                  | 1                            | 1:6.3                                                                  | 1.5:1                                   |
|                               | 1.4                                                                                    | 390                                                  | 37                           |                                                                        |                                         |
|                               | 1.5                                                                                    | 100                                                  | 1                            |                                                                        |                                         |
|                               | 3.2                                                                                    | 3000                                                 | 42                           |                                                                        |                                         |
|                               | 7.4                                                                                    | 600                                                  | 15                           |                                                                        |                                         |
|                               | 8.6                                                                                    | 1120                                                 | 4                            |                                                                        |                                         |

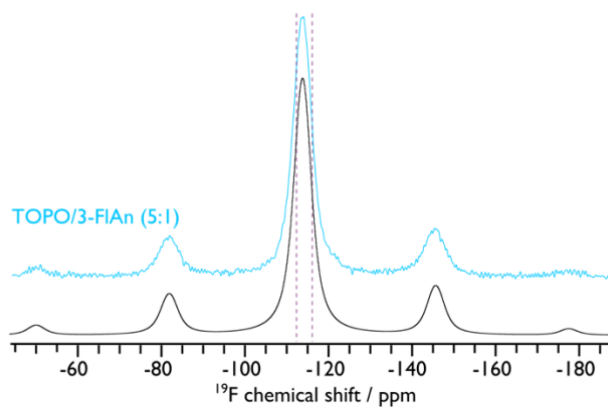

**Figure S18.**  $\{^1\text{H}\}\text{-}^{19}\text{F}$  CP MAS NMR spectrum of TOPO/3-FIAn (5:1) CdS NCs and associated fit (black). The positions indicated with the vertical dashed lines are the same as those given in Figure 5 of the main text.

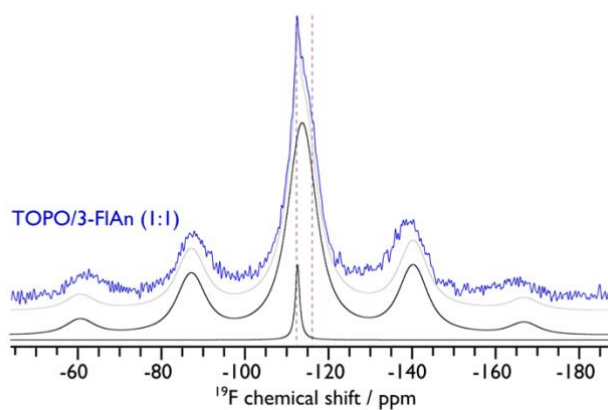

**Figure S19.**  $\{^1\text{H}\}\text{-}^{19}\text{F}$  CP MAS NMR spectrum of TOPO/3-FIAn (1:1) CdS NCs and associated fitting with deconvolution (black) and summation (grey). The positions indicated with the vertical dashed lines are the same as those given in Figure 5 of the main text.



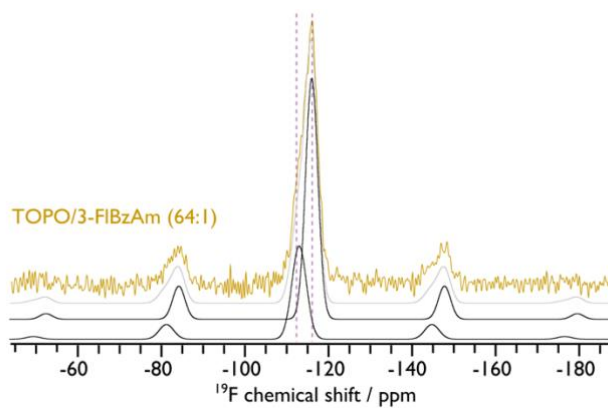

**Figure S20.**  $\{^1\text{H}\}\text{-}^{19}\text{F}$  CP MAS NMR spectrum of TOPO/3-FIBzAm (64:1) CdS NCs and associated fitting with deconvolution (black) and summation (grey). The positions indicated with the vertical dashed lines are the same as those given in Figure 5 of the main text.

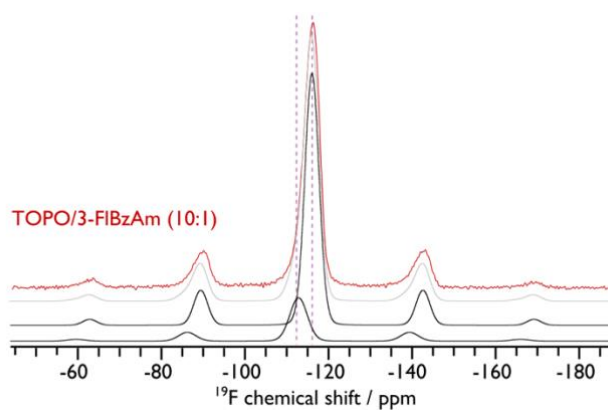

**Figure S21.**  $\{^1\text{H}\}\text{-}^{19}\text{F}$  CP MAS NMR spectrum of TOPO/3-FIBzAm (10:1) CdS NCs and associated fitting with deconvolution (black) and summation (grey). The positions indicated with the vertical dashed lines are the same as those given in Figure 5 of the main text.

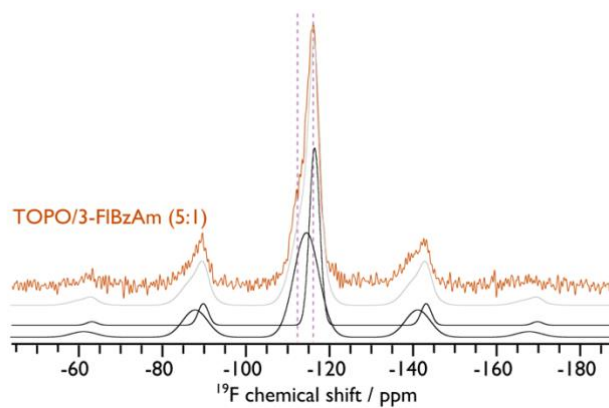

**Figure S22.**  $\{^1\text{H}-\}^{19}\text{F}$  CP MAS NMR spectrum of TOPO/3-FIBzAm (5:1) CdS NCs and associated fitting with deconvolution (black) and summation (grey). The positions indicated with the vertical dashed lines are the same as those given in Figure 5 of the main text.

**Table S3.**  $^{19}\text{F}$  NMR parameters extracted from data fitting (see Figs. S15-S19). The values given for the span ( $\Omega = \delta_{11} - \delta_{33}$ ) and skew ( $\kappa = 3(\delta_{22} - \delta_{iso})/\Omega$ ) are not definitive owing to the large errors with the fitting.

| <b>CdS nanocrystal system</b> | <b><math>^{19}\text{F}</math> chemical shift (<math>\delta_{iso}</math>) / ppm</b> | <b><math>^{19}\text{F}</math> chemical shift span (<math>\Omega</math>) / ppm</b> | <b><math>^{19}\text{F}</math> chemical shift skew (<math>\kappa</math>)</b> | <b>Relative integral / %</b> |
|-------------------------------|------------------------------------------------------------------------------------|-----------------------------------------------------------------------------------|-----------------------------------------------------------------------------|------------------------------|
| TOPO only                     | N/A                                                                                | N/A                                                                               | N/A                                                                         | N/A                          |
| TOPO:3-FIAn (5:1)             | -113.7                                                                             | 83                                                                                | -0.2                                                                        | 100                          |
| TOPO:3-FIAn (1:1)             | -113.7<br>-112.6                                                                   | 87<br>0                                                                           | -0.2<br>N/A                                                                 | 97<br>3                      |
| TOPO:3-FIBzAm (64:1)          | -116.0<br>-113.0                                                                   | 76<br>80                                                                          | 0<br>0                                                                      | 68<br>32                     |
| TOPO:3-FIBzAm (10:1)          | -116.1<br>-112.9                                                                   | 64<br>76                                                                          | 0<br>0                                                                      | 81<br>19                     |
| TOPO:3-FIBzAm (5:1)           | -117.5<br>-115.5                                                                   | 60<br>84                                                                          | 0<br>0                                                                      | 35<br>65                     |

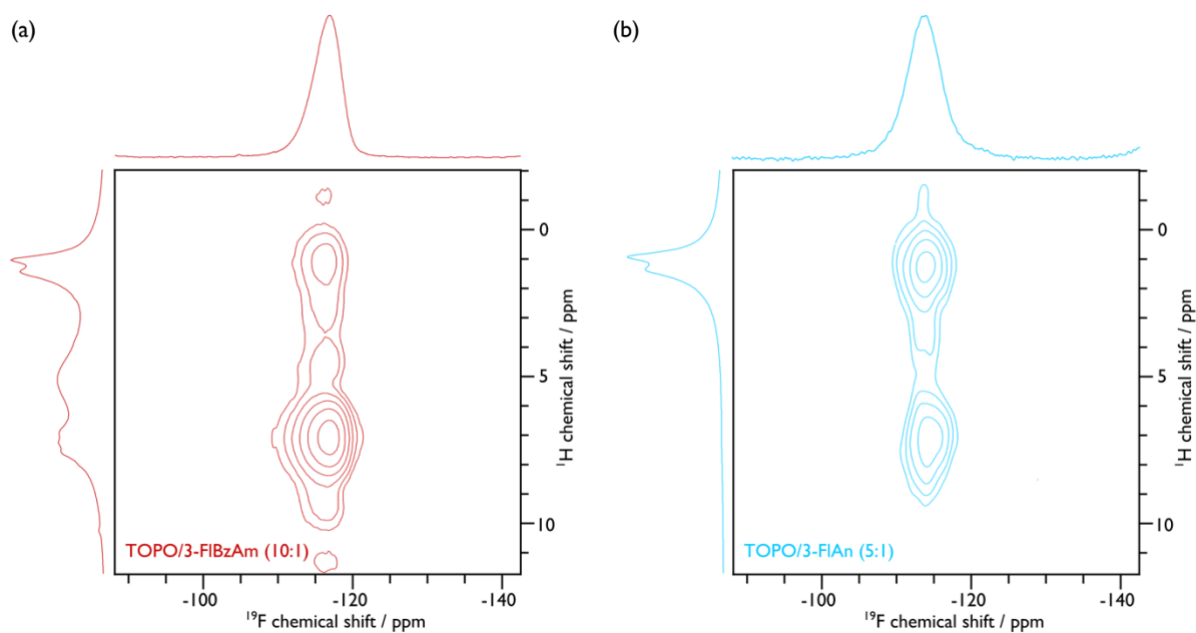

**Figure S23.**  ${}^1\text{H}$ - ${}^{19}\text{F}$  2D dipolar correlation MAS NMR spectra of indicated CdS NCs. An MAS frequency of 12 kHz was used for both. Corresponding  $\{{}^1\text{H}\}$ - ${}^{19}\text{F}$  CP (top) and  ${}^1\text{H}$  (left) MAS NMR spectra are provided for comparison.

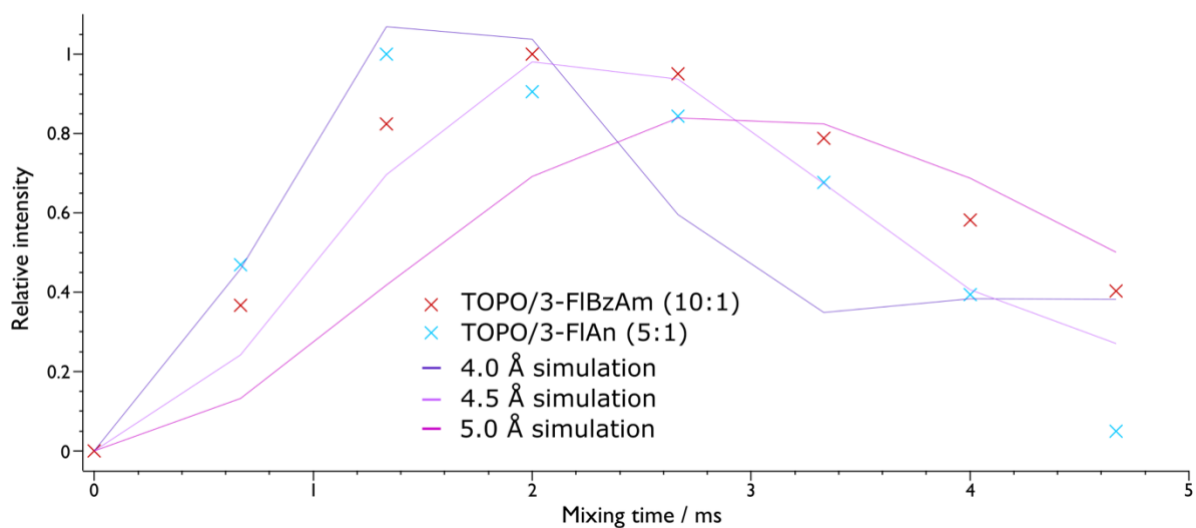

**Figure S24.** Plots of relative intensity of 1D  $^{19}\text{F}$  homonuclear double-quantum-filtered dipolar correlation NMR spectra as a function of SPC-5<sup>1</sup> mixing time for (a) TOPO/3-FIBzAm (10:1) and (b) TOPO/3-FIAn (5:1) CdS NCs. An MAS frequency of 12 kHz was used for both datasets. Also shown are numerical simulations using SIMPSON<sup>2</sup> software for the corresponding intensity buildup curves for the indicated internuclear distances.

## X-ray photoelectron spectroscopy

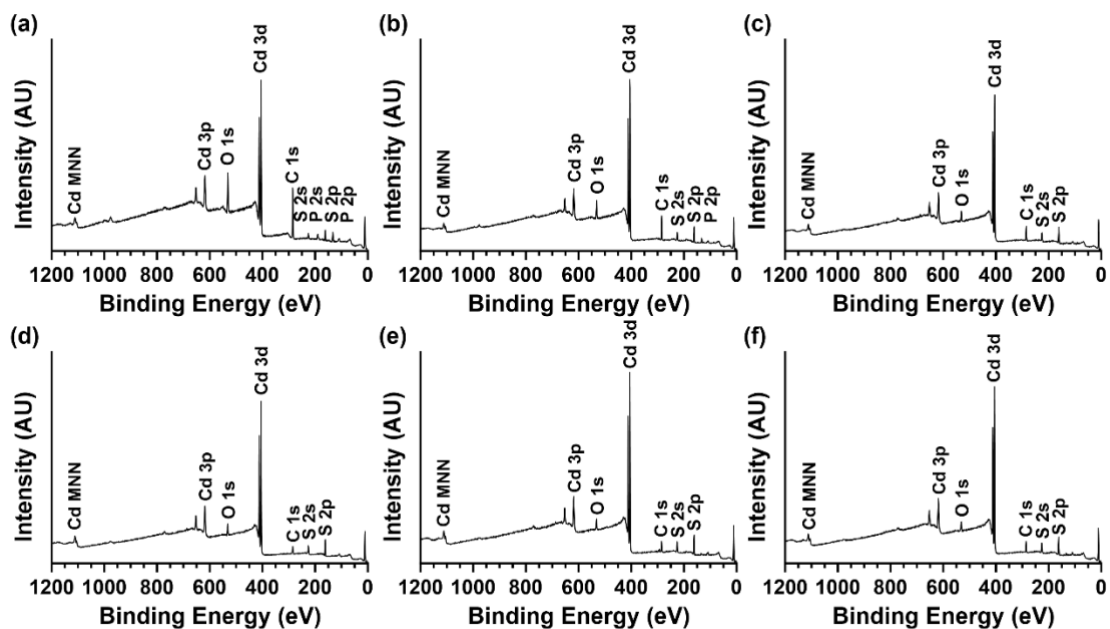

**Figure S25.** XPS survey spectra where (a) TOPO only, (b) 5:1 TOPO:3-F1An, (c) 1:1 TOPO:3-F1An, (d) 5:1 TOPO:3-FIBzAm, (e) 10:1 TOPO:3-FIBzAm and (f) 64:1 TOPO:3-FIBzAm are all shown.

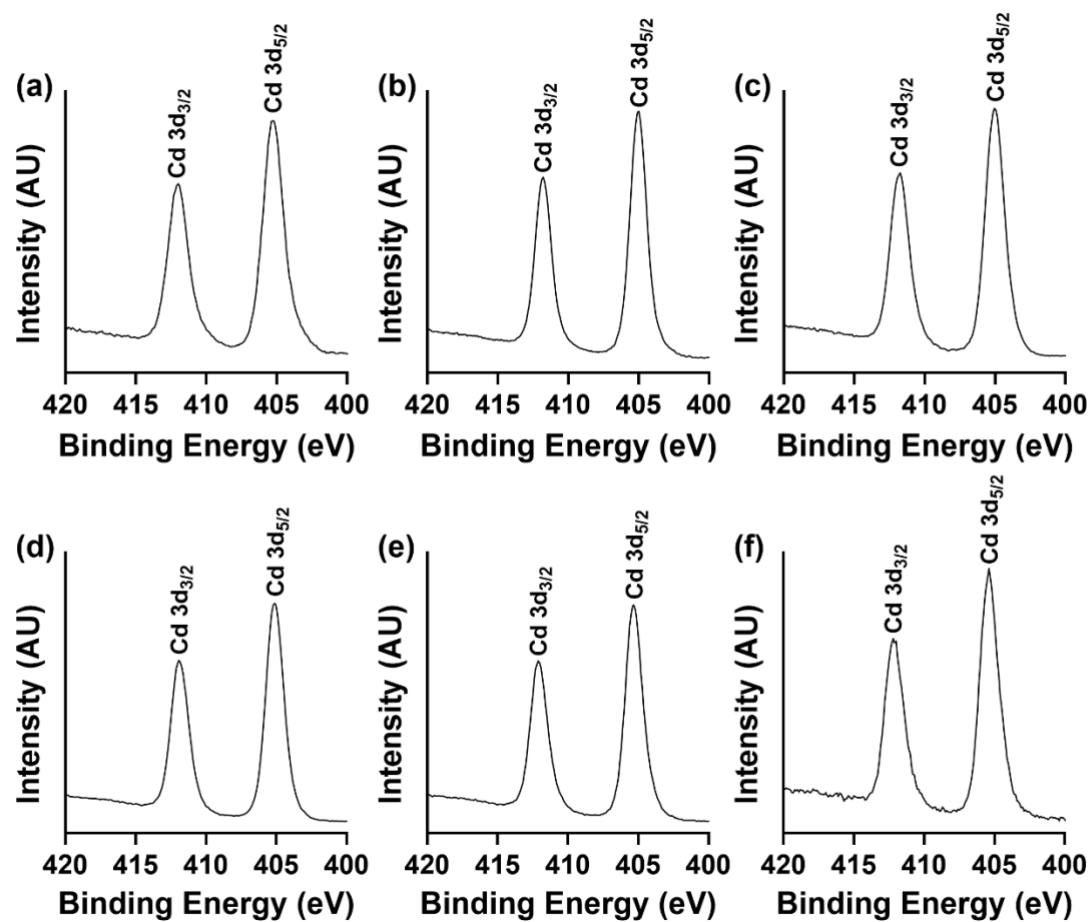

**Figure S26.** Cd3d of the XPS analysis where (a) TOPO only, (b) 5:1 TOPO:3-FIAn, (c) 1:1 TOPO:3-FIAn, (d) 5:1 TOPO:3-FIBzAm, (e) 10:1 TOPO:3-FIBzAm and (f) 64:1 TOPO:3-FIBzAm are all shown.

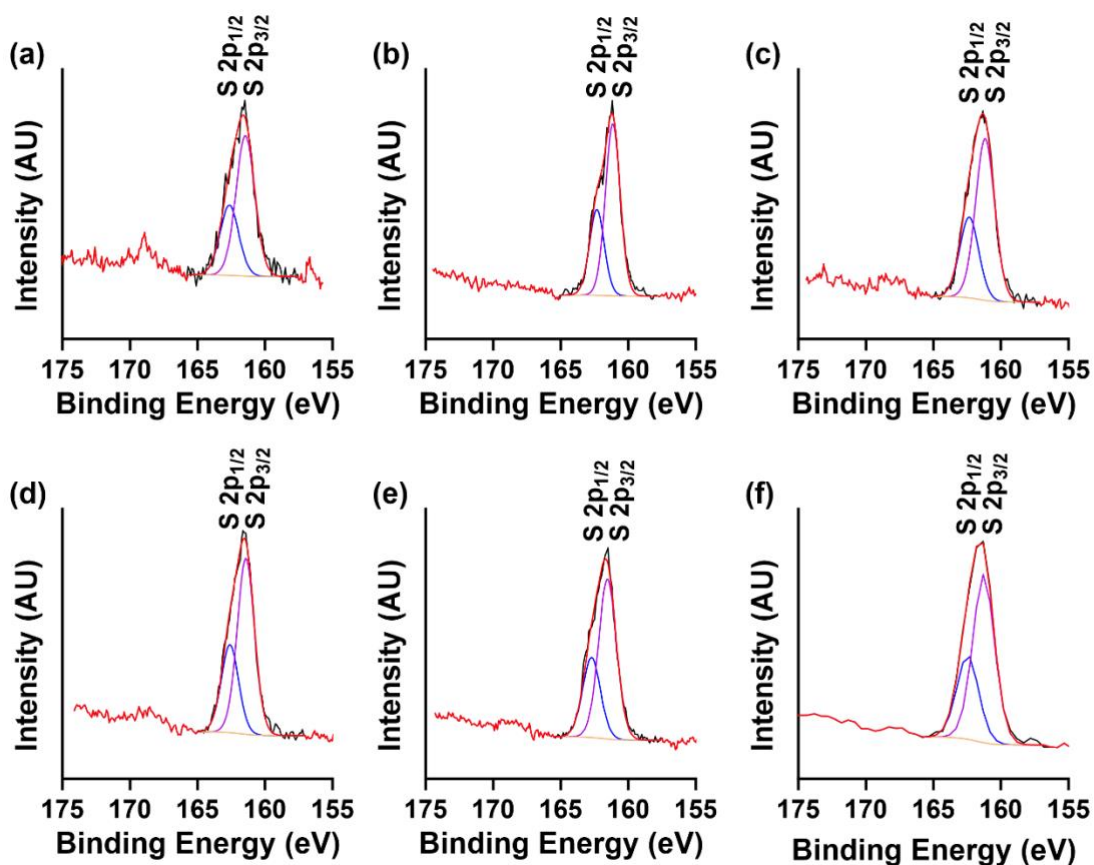

**Figure S27.** S2p of the XPS analysis where (a) TOPO only, (b) 5:1 TOPO:3-FIAn, (c) 1:1 TOPO:3-FIAn, (d) 5:1 TOPO:3-FIBzAm, (e) 10:1 TOPO:3-FIBzAm and (f) 64:1 TOPO:3-FIBzAm are all shown.

**Table S4.** Relative elemental amount from XPS quantification.

| CdS NC system        | C 1s % | Cd %  | O 1s % | P 2p % | S 2p % |
|----------------------|--------|-------|--------|--------|--------|
| TOPO only            | 54.66  | 13.26 | 14.83  | 10.11  | 7.13   |
| TOPO:3-FIAn (5:1)    | 40.02  | 21.20 | 12.66  | 7.77   | 18.35  |
| TOPO:3-FIAn (1:1)    | 37.71  | 24.92 | 9.03   | 1.89   | 26.46  |
| TOPO:3-FIBzAm (5:1)  | 25.62  | 30.98 | 12.06  | 0.93   | 30.41  |
| TOPO:3-FIBzAm (10:1) | 24.68  | 30.29 | 10.31  | 2.85   | 31.87  |
| TOPO:3-FIBzAm (64:1) | 27.14  | 28.47 | 10.41  | 4.37   | 29.61  |



## Band gap analysis

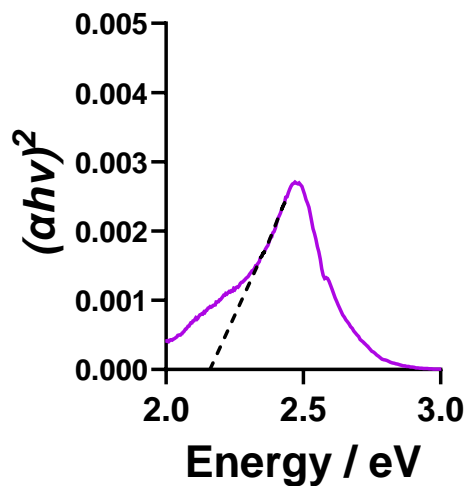

**Figure S28.** Calculated Tauc plot of the 64:1 TOPO:3-FIBzAm synthesised CdS nanocrystals suspended in toluene.

**Table S5.** Table of data for Scherrer analysis particle size and UV-Vis Tauc plot band gap energy of the synthesised CdS nanocrystals.

| CdS nanocrystal system | Particle size (Scherrer) / nm | Band gap energy / eV |
|------------------------|-------------------------------|----------------------|
| TOPO only              | 19                            | 2.7                  |
| TOPO:3-FIAn (5:1)      | 37                            | 2.2                  |
| TOPO:3-FIAn (1:1)      | 70                            | 2.3, 3.7             |
| TOPO:3-FIBzAm (64:1)   | 80                            | 2.2, 4.2             |
| TOPO:3-FIBzAm (10:1)   | 83                            | 4.1                  |
| TOPO:3-FIBzAm (5:1)    | 200                           | 4.0                  |

## References

- 1 M. Hohwy, C. M. Rienstra, C. P. Jaroniec and R. G. Griffin, *The Journal of Chemical Physics*, 1999, **110**, 7983–7992.
- 2 M. Bak, J. T. Rasmussen and N. Chr. Nielsen, *Journal of Magnetic Resonance*, 2011, **213**, 366–400.
